# Supplementary material for: Maternal Blood Adipokines and Their Association with Fetal Growth: A Meta-Analysis of the Current Literature
Source: MDPI journal article supplement (doi:10.3390/jcm13061667), 2024-03-14
Supplement: s1 [file s1]

| Patient characteristics (Cases vs. <b>Controls</b> ) |                                    |                                            |                                            |                       |                                                                                                   |              |                |               |                        |                                  |                     |                                          |                                            |                 |                                                                           |
|------------------------------------------------------|------------------------------------|--------------------------------------------|--------------------------------------------|-----------------------|---------------------------------------------------------------------------------------------------|--------------|----------------|---------------|------------------------|----------------------------------|---------------------|------------------------------------------|--------------------------------------------|-----------------|---------------------------------------------------------------------------|
| Year;<br>author                                      | N                                  | Age                                        | Pre-<br>pregnancy<br>BMI                   | BMI at<br>birth       | Race<br>(White/Black/Other)                                                                       | DM           | Nulliparous    | Smoking       | PIH                    | PET                              | Cesarean<br>section | Gestational age at<br>delivery           | Birthweight                                | APGAR<br>Score  | Umbilical<br>cord pH                                                      |
| Nezar et al,<br>2008                                 | 20/ <b>15</b>                      | 27.1/ <b>28.4</b>                          | 28.7/ <b>29.4</b>                          | n/a                   | n/a                                                                                               | n/a          | n/a            | n/a           | n/a                    | n/a                              | 8 / <b>11</b>       | 37.4 / <b>38.5</b>                       | 2250 / <b>3250</b>                         | 9.1 / <b>10</b> | n/a                                                                       |
| Stefaniak<br>et al, 2022                             | 25/ <b>194</b>                     | 31/ <b>30</b>                              | n/a                                        | 25.7 /<br><b>28.1</b> | n/a                                                                                               | n/a          | n/a            | n/a           | n/a                    | n/a                              | n/a                 | 37 / <b>38.9</b>                         | 2440 / <b>3454</b>                         | n/a             | n/a                                                                       |
| Visentin et<br>al, 2014                              | 37/ <b>70</b>                      | 32.70<br>/ <b>32.00</b>                    | 23.80 / <b>22.1</b>                        | n/a                   | n/a                                                                                               | n/a          | 25 / <b>37</b> | n/a           | n/a                    | n/a                              | 23 / <b>32</b>      | 36.75 / <b>38.57</b>                     | 2131.67<br>/ <b>3178.17</b>                | n/a             | n/a                                                                       |
| Zareaan et<br>al, 2017                               | 40/40                              | 27.28<br>/ <b>28.05</b>                    | 23.04 /<br><b>23.18</b>                    | n/a                   | n/a                                                                                               | n/a          | n/a            | 0 / <b>0</b>  | n/a                    | n/a                              | n/a                 | 37.10 / <b>37.35</b>                     | 2321.25 /<br><b>3219.5</b>                 | n/a             | n/a                                                                       |
| Aydin et al,<br>2015                                 | 16/ <b>16</b>                      | 29.6 / <b>30.7</b>                         | 22.9 / <b>22.9</b>                         | 27.7 /<br><b>27.9</b> | 16/0/0 / <b>16/0/0</b>                                                                            | 0/ <b>0</b>  | n/a            | 0/ <b>0</b>   | 0/ <b>0</b>            | 0/ <b>0</b>                      | n/a                 | 37.5 / <b>38.0</b>                       | 2384 / <b>3218</b>                         | n/a             | n/a                                                                       |
| Catov et al,<br>2007                                 | 28/77                              | 22.9 / <b>21.9</b>                         | n/a                                        | 24.6 /<br><b>23.8</b> | 18white+other/10 black<br>/<br><b>53white+other/24black</b>                                       | 0 / <b>0</b> | 28/ <b>12</b>  | 0/ <b>0</b>   | 0/ <b>0</b>            | 0/ <b>0</b>                      | n/a                 | 39.6 / <b>39.7</b>                       | 2489 / <b>3342</b>                         | n/a             | n/a                                                                       |
| Ferrero et<br>al, 2014                               | 46/ <b>81</b>                      | 29.9 / <b>31.8</b>                         | n/a                                        | 22.3 /<br><b>23.4</b> | 43 Spanish nationality /<br><b>79 Spanish nationality</b>                                         | 0/ <b>0</b>  | n/a            | 18/ <b>16</b> | 0/ <b>0</b>            | 0/ <b>0</b>                      | n/a                 | 37.3/ <b>39.4</b>                        | 2127/ <b>3270</b>                          | n/a             | Arterial<br>pH 7.23 /<br><b>7.26</b><br>Venous<br>pH<br>7.29/ <b>7.31</b> |
| Garofoli et<br>al, 2022                              | 13/ <b>16</b>                      | 32/ <b>31</b>                              | 23/ <b>23.5</b>                            | 26/ <b>28</b>         | n/a                                                                                               | n/a          | n/a            | n/a           | n/a                    | n/a                              | 10 / <b>1</b>       | 36.6 / <b>40.5</b>                       | 1770.0<br>/ <b>3242.5</b>                  | 9/10            | n/a                                                                       |
| Jenkins et<br>al, 2007                               | A)27/ <b>30</b><br>B)30/ <b>30</b> | A)20.9/ <b>20.9</b><br>B)25.9/ <b>28.9</b> | A)22.7/ <b>23.5</b><br>B)23.5/ <b>23.8</b> | A)n/a<br>B) n/a       | A)27 black/0white<br>+other/ <b>30 black</b><br><br>B) 30 white/0black<br>+other/ <b>30 black</b> | n/a          | n/a            | n/a           | n/a                    | n/a                              | n/a                 | A)39.6/ <b>39</b><br>B)38.8/ <b>39.4</b> | A)2501/ <b>3073</b><br>B)2348/ <b>3560</b> | n/a             | n/a                                                                       |
| Kyriakakou<br>et al, 2008                            | 20/ <b>20</b>                      | 30.8/ <b>31.2</b>                          | n/a                                        | 22.9/21.4             | n/a                                                                                               | 10/ <b>9</b> | 17/ <b>9</b>   | 5/ <b>0</b>   | n/a                    | n/a                              | 12/ <b>6</b>        | 265.6(days)/ <b>272(days)</b>            | 2379/ <b>3160</b>                          | ≥8/ <b>≥8</b>   | n/a                                                                       |
| Laivuori et<br>al, 2006                              | 20/ <b>18</b>                      | 21.7/ <b>21.2</b>                          | 22.6/ <b>22.7</b>                          | n/a                   | 11/9/0 / <b>0/18/0</b>                                                                            | 0/ <b>0</b>  | 17/ <b>18</b>  | 14/ <b>8</b>  | 0/ <b>0</b>            | 0/ <b>0</b>                      | 2/ <b>2</b>         | 39.7/ <b>39.8</b>                        | n/a                                        | n/a             | n/a                                                                       |
| Lepercq et<br>al, 2002                               | 13/ <b>9</b>                       | 31.4/ <b>30.7</b>                          | n/a                                        | 21.7/24.3             | n/a                                                                                               | 0/ <b>0</b>  | n/a            | n/a           | 0/ <b>0</b>            | 0/ <b>0</b>                      | n/a                 | 35.2/ <b>33.5</b>                        | 1711/ <b>2351</b>                          | n/a             | Arterial<br>7.33/ <b>7.27</b>                                             |
| Mise et al,<br>2007                                  | A)15/ <b>25</b><br>B)11/ <b>87</b> | A)30.7/ <b>30.5</b><br>B)32.1/ <b>28.2</b> | n/a                                        | n/a                   | n/a                                                                                               | n/a          | n/a            | n/a           | A)0/ <b>0</b><br>B)n/a | A)15/ <b>25</b><br>B)0/ <b>0</b> | A)n/a<br>B)n/a      | n/a                                      | n/a                                        | n/a             | n/a                                                                       |

**Table S2.** Demographic characteristics of the included patients whose leptin levels were assessed. Abbreviations: **BMI**: Body Mass Index, **DM**: Diabetes Mellitus, **PIH**: Pregnancy Induced Hypertension, **PET**: Preeclampsia, **n/a**: not applicable
