# Supplementary material for: Maternal Blood Adipokines and Their Association with Fetal Growth: A Meta-Analysis of the Current Literature
Source: MDPI journal article supplement (doi:10.3390/jcm13061667), 2024-03-14
Supplement: s1 [file s1]

| Patient characteristics (Cases vs Controls) |       |                      |                     |                    |                          |      |                |         |     |     |                  |                                  |                          |               |                   |
|---------------------------------------------|-------|----------------------|---------------------|--------------------|--------------------------|------|----------------|---------|-----|-----|------------------|----------------------------------|--------------------------|---------------|-------------------|
| Year; author                                | N     | Age                  | Pre-pregnancy BMI   | BMI at birth       | Race (White/Black/Other) | DM   | Nulliparous    | Smoking | PIH | PET | Cesarean section | Gestational age at delivery      | Birthweight              | APGAR Score   | Umbilical cord pH |
| Visentin et al, 2014                        | 37/70 | 32.70 / <b>32.00</b> | 23.80 / <b>22.1</b> | n/a                | n/a                      | n/a  | 25 / <b>37</b> | n/a     | n/a | n/a | 23 / <b>32</b>   | 36.75 / <b>38.57</b>             | 2131.67 / <b>3178.17</b> | n/a           | n/a               |
| Aydin et al, 2015                           | 16/16 | 29.6 / <b>30.7</b>   | 22.9 / <b>22.9</b>  | 27.7 / <b>27.9</b> | 16/0/0 / <b>16/0/0</b>   | 0/0  | n/a            | 0/0     | 0/0 | 0/0 | n/a              | 37.5 / <b>38.0</b>               | 2384 / <b>3218</b>       | n/a           | n/a               |
| Kyriakakou et al, 2008                      | 20/20 | 30.8/ <b>31.2</b>    | n/a                 | 22.9/21.4          | n/a                      | 10/9 | 17/9           | 5/0     | n/a | n/a | 12/6             | 265.6(days)/ <b>272(days)</b>    | 2379/ <b>3160</b>        | ≥8/ <b>≥8</b> | n/a               |
| Wang et al, 2010                            | 30/40 | 27.6 / <b>26</b>     | n/a / <b>23.5</b>   | n/a                | n/a                      | n/a  | n/a            | n/a     | n/a | n/a | n/a              | 275.8 (days)/ <b>276.9(days)</b> | 2300 / <b>3700</b>       | n/a           | n/a               |

**Table S4.** Demographic characteristics of the included patients whose adiponectin levels were assessed. Abbreviations: **BMI**: Body Mass Index, **DM**: Diabetes Mellitus, **PIH**: Pregnancy Induced Hypertension, **PET**: Preeclampsia, **n/a**: not applicable
