# Supplementary material for: Maternal Blood Adipokines and Their Association with Fetal Growth: A Meta-Analysis of the Current Literature
Source: MDPI journal article supplement (doi:10.3390/jcm13061667), 2024-03-14
Supplement: s1 [file s1]

| Methodological characteristics of included studies (maternal serum leptin) |                                              |                                                                                                                                                                                                                                                                                                       |                                                                                                                                                                                                                                                                                                                                                                                                                                                                                                                                                    |
|----------------------------------------------------------------------------|----------------------------------------------|-------------------------------------------------------------------------------------------------------------------------------------------------------------------------------------------------------------------------------------------------------------------------------------------------------|----------------------------------------------------------------------------------------------------------------------------------------------------------------------------------------------------------------------------------------------------------------------------------------------------------------------------------------------------------------------------------------------------------------------------------------------------------------------------------------------------------------------------------------------------|
| Year; author                                                               | Study type                                   | Inclusion criteria                                                                                                                                                                                                                                                                                    | Exclusion criteria                                                                                                                                                                                                                                                                                                                                                                                                                                                                                                                                 |
| Nezar et al, 2008 [14]                                                     | Prospective cohort                           | <ul style="list-style-type: none"> <li>• Singleton pregnancies</li> <li>• FGR: EFW&lt;10<sup>TH</sup> centile</li> </ul>                                                                                                                                                                              | <ul style="list-style-type: none"> <li>• Multiple pregnancies</li> <li>• Evidence of chromosomal abnormalities or fetal anatomic defects</li> <li>• Consent not given</li> </ul>                                                                                                                                                                                                                                                                                                                                                                   |
| Stefaniak et al, 2022 [16]                                                 | Prospective cohort                           | <ul style="list-style-type: none"> <li>• Singleton pregnancies</li> <li>• FGR: AC&lt;5<sup>TH</sup> centile + BW&lt;10<sup>th</sup> centile</li> </ul>                                                                                                                                                | <ul style="list-style-type: none"> <li>• Multiple pregnancies</li> <li>• Consent not given</li> </ul>                                                                                                                                                                                                                                                                                                                                                                                                                                              |
| Visentin et al, 2014 [15]                                                  | Retrospective cohort                         | <ul style="list-style-type: none"> <li>• Singleton pregnancies</li> <li>• FGR: EFW &lt;10<sup>TH</sup> centile + UA Pulsatility Index &gt; 2 SD</li> </ul>                                                                                                                                            | <ul style="list-style-type: none"> <li>• Multiple pregnancies</li> <li>• Evidence of chromosomal abnormalities or fetal anatomic defects</li> <li>• Consent not given</li> <li>• Pregnancies complicated by maternal history of cardiovascular disease or endocrine disorder</li> <li>• Clinical chorioamnionitis</li> <li>• Consumption of alcohol, smoke, nicotine, or any medication such as ritodrine and corticosteroids (except for fetal lung maturation)</li> <li>• Amniotic fluid disorders</li> <li>• Placental abnormalities</li> </ul> |
| Zareean et al, 2017 [18]                                                   | Cross – sectional study                      | <ul style="list-style-type: none"> <li>• maternal age &lt;40 yr</li> <li>• singleton pregnancy</li> <li>• gestational age &gt;36 weeks</li> <li>• non-smoking and substance abuse or teratogenic drug</li> <li>• body mass index (BMI) between 20-27 Kg/m<sup>2</sup></li> </ul>                      | <ul style="list-style-type: none"> <li>• Multiple pregnancies</li> <li>• Inability to determine the level of leptin</li> <li>• Withdrawal of participants</li> <li>• Pregnancy complications</li> <li>• Systemic problems including: kidney disease, anemia, history of diabetes before pregnancy, heart disease</li> <li>• FGR in previous pregnancy</li> <li>• Pregnancy with assisted reproductive techniques (ART)</li> <li>• Congenital malformations</li> </ul>                                                                              |
| Aydin et al, 2015 [20]                                                     | Prospective case control                     | <ul style="list-style-type: none"> <li>• IUGR: BW or length &lt;10<sup>th</sup> percentile with pathological fetal growth restriction</li> <li>• Maternal age 18-40</li> <li>• Singleton pregnancy</li> <li>• Gestational age 36-40</li> <li>• IUGR diagnosed in second or third trimester</li> </ul> | <ul style="list-style-type: none"> <li>• BW&gt; 10<sup>th</sup> percentile</li> <li>• Multiple pregnancies</li> <li>• Systemic illness (gestational diabetes, preeclampsia, eclampsia, chronic hypertension, vascular diseases, thrombophilia)</li> <li>• Infectious diseases</li> <li>• Uterine malformation</li> <li>• Smoking</li> <li>• Fetuses with congenital malformation or chromosomal anomaly</li> <li>• Consent not given</li> </ul>                                                                                                    |
| Catov et al, 2007 [17]                                                     | Nested case control study                    | <ul style="list-style-type: none"> <li>• SGA: &lt;10th percentile</li> <li>• Nulliparous</li> <li>• Normotensive</li> <li>• Maternal age 14-44</li> <li>• &lt;20 weeks' gestation when enrolled</li> </ul>                                                                                            | <ul style="list-style-type: none"> <li>• Preeclampsia</li> <li>• Transient hypertension</li> <li>• Multiple gestation</li> <li>• Gestational diabetes</li> <li>• Chronic conditions</li> <li>• Positive toxicology screen</li> <li>• Consent not given</li> </ul>                                                                                                                                                                                                                                                                                  |
| Ferrero et al, 2014 [61]                                                   | Prospective study                            | <ul style="list-style-type: none"> <li>• FGR: &lt;10th percentile and normal Doppler values</li> </ul>                                                                                                                                                                                                | <ul style="list-style-type: none"> <li>• Consent not given</li> <li>• Use of drugs that may interfere with fetal growth or biochemical markers</li> <li>• Genetic alterations of growth potential</li> <li>• Gestational diabetes</li> <li>• Multiple pregnancy</li> <li>• Hypertension or preeclampsia</li> <li>• Pregnancy not controlled at the hospital</li> <li>• Delivery attended in other hospital</li> </ul>                                                                                                                              |
| Garofoli et al, 2022 [19]                                                  | Prospective longitudinal observational study | <ul style="list-style-type: none"> <li>• IUGR: flussimetric findings during ultrasound imaging and did not reach their genetically determined potential growth</li> <li>• Breastfeeding until the end of the third month of life</li> </ul>                                                           | <ul style="list-style-type: none"> <li>• Infants with congenital malformations</li> <li>• Infants with infection</li> <li>• Genetic syndromes</li> <li>• Formula fed</li> <li>• Infants large for gestational age</li> <li>• Consent not given</li> </ul>                                                                                                                                                                                                                                                                                          |

|                             |                       |                                                                                                                                                                  |                                                                                                              |
|-----------------------------|-----------------------|------------------------------------------------------------------------------------------------------------------------------------------------------------------|--------------------------------------------------------------------------------------------------------------|
| Jenkins et al, 2007 [60]    | Case control study    | <ul style="list-style-type: none"> <li>• SGA: BW&lt;10th centile</li> <li>• Normal controls: no clinical signs of hypertension, diabetes or infection</li> </ul> | <ul style="list-style-type: none"> <li>• Consent not given</li> </ul>                                        |
| Kyriakakou et al, 2008 [38] | Prospective cohort    | <ul style="list-style-type: none"> <li>• IUGR: BW&lt;3rd centile</li> <li>• Full term singleton infants</li> </ul>                                               | <ul style="list-style-type: none"> <li>• Consent not given</li> </ul>                                        |
| Laivuori et al, 2006 [62]   | Cross sectional study | <ul style="list-style-type: none"> <li>• IUGR</li> <li>• Written informed consent</li> <li>• Controls: uncomplicated pregnancies</li> </ul>                      | <ul style="list-style-type: none"> <li>• Preexisting diabetes</li> <li>• Consent not given</li> </ul>        |
| Lepercq et al, 2002 [63]    | Cross sectional study | <ul style="list-style-type: none"> <li>• Normotensive IUGR : BW&lt;10th percentile</li> <li>• Controls: AGA preterm infants</li> </ul> <p>Informed consent</p>   | <ul style="list-style-type: none"> <li>• Diabetes</li> <li>• Obesity</li> <li>• Consent not given</li> </ul> |
| Mise et al, 2007 [64]       | Retrospective cohort  | <ul style="list-style-type: none"> <li>• Group A preeclampsia ± SGA</li> <li>• Group B non preeclampsia ±SGA</li> <li>• SGA: BW&lt;10th percentile</li> </ul>    | <ul style="list-style-type: none"> <li>• Consent not given</li> </ul>                                        |

**Table S1.** The methodological characteristics of the included studies that investigated leptin. Abbreviations: **FGR**: Fetal Growth Restriction, **IUGR**: Intrauterine Growth Restriction, **EFW**: Estimated Fetal Weight, **SGA**: Small for Gestational Age, **BW**: Birth Weight, **SD**: Standard Deviation.
